# Supplementary material
Source: PubMed Central journal article supplement (PMC5498320)
Supplement: supp_5.2.E488_2015-0139_original_submission.pdf [file supp_5.2.E488_2015-0139_original_submission.pdf]

## An environmental scan of quality indicators in critical care

|                               |                                                                                                                                                                                                                                                                                                                                                                                                                                                                                                                                                                                                                                                                                                                                                                                                                                                                                                                                                                                                                                                                                                                                                                                                                                                                                                                                                                                                                                                                                                                                       |
|-------------------------------|---------------------------------------------------------------------------------------------------------------------------------------------------------------------------------------------------------------------------------------------------------------------------------------------------------------------------------------------------------------------------------------------------------------------------------------------------------------------------------------------------------------------------------------------------------------------------------------------------------------------------------------------------------------------------------------------------------------------------------------------------------------------------------------------------------------------------------------------------------------------------------------------------------------------------------------------------------------------------------------------------------------------------------------------------------------------------------------------------------------------------------------------------------------------------------------------------------------------------------------------------------------------------------------------------------------------------------------------------------------------------------------------------------------------------------------------------------------------------------------------------------------------------------------|
| Journal:                      | <i>CMAJ Open</i>                                                                                                                                                                                                                                                                                                                                                                                                                                                                                                                                                                                                                                                                                                                                                                                                                                                                                                                                                                                                                                                                                                                                                                                                                                                                                                                                                                                                                                                                                                                      |
| Manuscript ID                 | CMAJOpen-2015-0139                                                                                                                                                                                                                                                                                                                                                                                                                                                                                                                                                                                                                                                                                                                                                                                                                                                                                                                                                                                                                                                                                                                                                                                                                                                                                                                                                                                                                                                                                                                    |
| Manuscript Type:              | Survey                                                                                                                                                                                                                                                                                                                                                                                                                                                                                                                                                                                                                                                                                                                                                                                                                                                                                                                                                                                                                                                                                                                                                                                                                                                                                                                                                                                                                                                                                                                                |
| Date Submitted by the Author: | 16-Dec-2015                                                                                                                                                                                                                                                                                                                                                                                                                                                                                                                                                                                                                                                                                                                                                                                                                                                                                                                                                                                                                                                                                                                                                                                                                                                                                                                                                                                                                                                                                                                           |
| Complete List of Authors:     | Valiani, Sabira; University of Ottawa<br>Rigal, Romain; CHUM, Medicine<br>Stelfox, Henry; University of Calgary, Department of Medicine<br>John, Muscedere; Queen's University, Medicine and Critical Care Medicine<br>Martin, Claudio; University of Western Ontario, Schulich School of Medicine & Dentistry, Critical Care Medicine<br>Dodek, Peter<br>Lamontagne, Francois; Universite de Sherbrooke<br>Fowler, Robert; Sunnybrook Hospital, Medicine and Critical Care Medicine<br>Gheshmy, Afshan; University of Ottawa<br>Cook, Deborah; McMaster U, Medicine Clin Epid Biostats<br>Forster, Alan; Ottawa Health Research Institute, Clinical Epidemiology Program<br>Hebert, Paul; Ottawa Hospital Research Institute, Clinical Epidemiology Program                                                                                                                                                                                                                                                                                                                                                                                                                                                                                                                                                                                                                                                                                                                                                                          |
| Keywords:                     | Critical care, intensive care                                                                                                                                                                                                                                                                                                                                                                                                                                                                                                                                                                                                                                                                                                                                                                                                                                                                                                                                                                                                                                                                                                                                                                                                                                                                                                                                                                                                                                                                                                         |
| More Detailed Keywords:       | quality indicators, performance, Donabedian, quality of care, quality improvement                                                                                                                                                                                                                                                                                                                                                                                                                                                                                                                                                                                                                                                                                                                                                                                                                                                                                                                                                                                                                                                                                                                                                                                                                                                                                                                                                                                                                                                     |
| Abstract:                     | <p>Quality indicators are increasingly collected and reported in the critically ill, with the aim of improving the value of patient care. We undertook an environmental scan to identify and categorize indicators unique to critical care that are reported by key organizations.</p> <p><b>Design</b></p> <p><b>Data Sources:</b> We convened a panel of 10 experts to identify key organizations that are focused on quality improvement or critical care. We then reviewed their on-line publications and searched their website content.</p> <p><b>Data Extraction:</b> We summarized indicators specific to the care of critically ill patients and then categorized them according to the Donabedian and the Institute of Medicine frameworks. We also noted the organizations' rationale for selection of these indicators, and their substantiation by published evidence.</p> <p><b>Results</b></p> <p><b>Data Synthesis:</b> From 28 targeted organizations, we identified 127 distinct quality indicators that are specific to critical care. Of these 32% were safety indicators and 31% were effectiveness indicators. The rationale for selecting these indicators was supported by published research evidence in 20% of indicators and by consensus in 26%. In most instances (54%), the rationale for selection was not reported or the reader was referred to other organizations' reports. Twenty-one percent of indicators were accompanied by a formal grading of evidence, whereas 41% percent provided no</p> |

1  
2  
3  
4  
5  
6  
7  
8  
9  
10  
11  
12  
13  
14  
15  
16  
17  
18  
19  
20  
21  
22  
23  
24  
25  
26  
27  
28  
29  
30  
31  
32  
33  
34  
35  
36  
37  
38  
39  
40  
41  
42  
43  
44  
45  
46  
47  
48  
49  
50  
51  
52  
53  
54  
55  
56  
57  
58  
59  
60

|  |                                                                                                                                                                                                                                                                                                    |
|--|----------------------------------------------------------------------------------------------------------------------------------------------------------------------------------------------------------------------------------------------------------------------------------------------------|
|  | reference to publications.<br>Conclusion<br>Although there are many quality indicators related to critical care in the public domain, due to a paucity of rationale for selection, supporting evidence, and results of implementation, it is not clear which indicators should be adopted for use. |
|  |                                                                                                                                                                                                                                                                                                    |

SCHOLARONE™  
Manuscripts

Confidential

1  
2  
3  
4  
5  
6  
7  
8  
9  
10  
11  
12  
13  
14  
15  
16  
17  
18  
19  
20  
21  
22  
23  
24  
25  
26  
27  
28  
29  
30  
31  
32  
33  
34  
35  
36  
37  
38  
39  
40  
41  
42  
43  
44  
45  
46  
47  
48  
49  
50  
51  
52  
53  
54  
55  
56  
57  
58  
59  
60

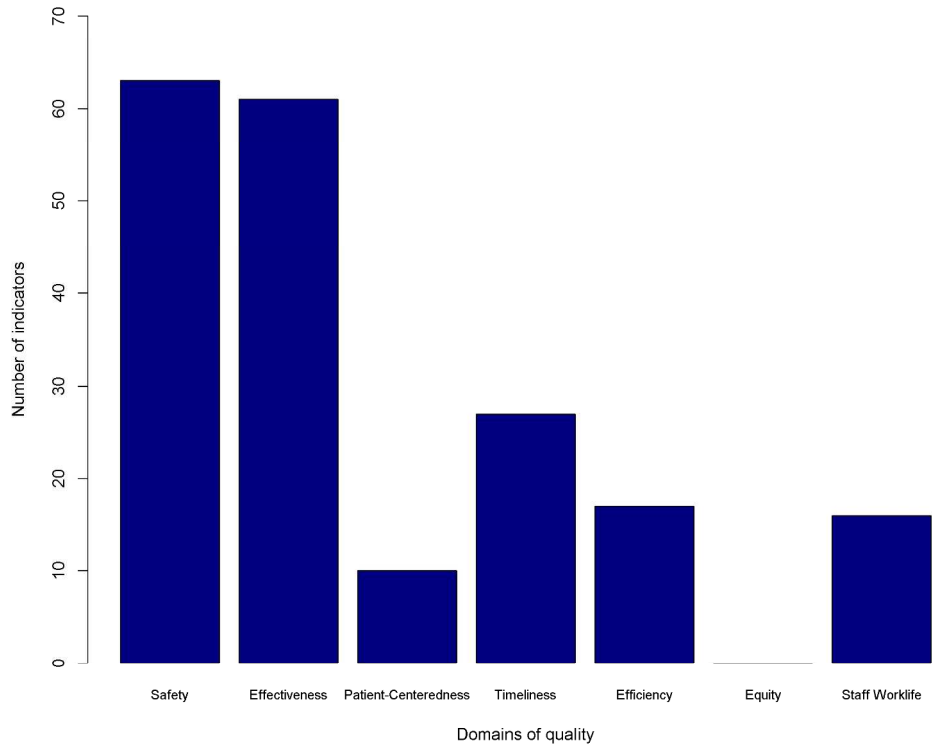

Number of Quality Indicators by Domain

254x211mm (300 x 300 DPI)

1  
2  
3  
4 **AN ENVIRONMENTAL SCAN OF QUALITY INDICATORS IN CRITICAL CARE**  
5

6  
7 Paul C. Hebert MD MHSc FRCPC  
8 Critical Care Physician & Physician-in-Chief, CHUM  
9 CRCHUM Centre hospitalier de l'Université de Montréal  
10 900 St-Denis, Suite R04-476  
11 Montreal, QC, H2X 0A9  
12 Phone: (514) 890-8000, poste 27282  
13 Internet: paul.hebert.chum@ssss.gouv.qc.ca  
14  
15

16 Sabira Valiani, MD<sup>1</sup>; Romain Rigal, PharmD, MSc<sup>2</sup>; Henry T Stelfox, MD, PhD<sup>3</sup>; John Muscedere, MD<sup>4</sup>;  
17  
18 Claudio M Martin, MD<sup>5</sup>; Peter Dodek, MD, MHSc<sup>6</sup>; François Lamontagne, MD, MSc<sup>7</sup>; Robert Fowler,  
19  
20 MD, MSc<sup>8</sup>; Afshan Gheshmy, MD<sup>1</sup>; Deborah J Cook, MD, MSc<sup>9</sup>; Alan J Forster, MD, MSc<sup>10</sup> and Paul C  
21  
22 Hébert, MD, MSc<sup>11</sup>.  
23

24  
25 <sup>1</sup> University of Ottawa, Ottawa, ON, Canada.  
26

27  
28 <sup>2</sup> Centre de Recherche du Centre Hospitalier de l'Université de Montréal (CRCHUM), Montréal, QC,  
29  
30 Canada.  
31

32  
33 <sup>3</sup> Department of Critical Care Medicine and Community Health Sciences, University of Calgary, Calgary,  
34  
35 AB, Canada.  
36

37  
38 <sup>4</sup> Department of Medicine, Queen's University, Kingston, ON, Canada.  
39

40  
41  
42 <sup>5</sup> London Health Sciences Centre, Lawson Health Research Institute, London, ON, Canada.  
43

44  
45 <sup>6</sup> Division of Critical Care Medicine and Center for Health Evaluation and Outcome Sciences, St. Paul's  
46  
47 Hospital and University of British Columbia, Vancouver, BC, Canada.  
48

49  
50 <sup>7</sup> Centre de Recherche Clinique Étienne-Le Bel, Université de Sherbrooke, Sherbrooke, QC, Canada.  
51

52  
53 <sup>8</sup> Departments of Medicine and Critical Care Medicine, Sunnybrook Hospital, Toronto, ON, Canada.  
54  
55

1  
2  
3 <sup>9</sup> Departments of Medicine Clinical Epidemiology and Biostatistics, McMaster University, Hamilton, ON,  
4  
5 Canada.  
6  
7

8  
9 <sup>10</sup> Department of Medicine, University of Ottawa, Clinical Epidemiology Program, Ottawa Hospital  
10  
11 Research Institute, Ottawa, ON, Canada.  
12

13  
14 <sup>11</sup> Département de Médecine, Centre Hospitalier de l'Université de Montréal (CHUM), Hôpital Notre-  
15  
16 Dame, Montréal, QC, Canada.  
17

18  
19 *Key words:* critical care, quality indicators, quality of care, quality improvement, intensive care unit.  
20  
21

22  
23  
24  
25  
26  
27  
28  
29  
30  
31  
32  
33  
34  
35  
36  
37  
38  
39  
40  
41  
42  
43  
44  
45  
46  
47  
48  
49  
50  
51  
52  
53  
54  
55  
56  
57  
58  
59  
60

Confidential

## Abstract

### Objective

Quality indicators are increasingly collected and reported in the critically ill, with the aim of improving the value of patient care. We undertook a directed environmental scan to identify and categorize indicators unique to critical care that are reported by key organizations.

### Design

*Data Sources:* We convened a panel of experts (n=10) to identify key organizations that are focused on quality improvement or critical care. We then reviewed their online publications and searched their website content.

*Data Extraction:* We summarized indicators specific to the care of critically ill patients and then categorized them according to the Donabedian and the Institute of Medicine frameworks. We also noted the organizations' rationale for selection of these indicators, and their substantiation by published evidence.

### Results

*Data Synthesis:* From 28 targeted organizations, we identified 127 distinct quality indicators that are specific to critical care. Of these 32% were safety indicators and 31% were effectiveness indicators. The rationale for selecting these indicators was supported by published research evidence in 20% of indicators and by consensus in 26%. In most instances (54%), the rationale for selection was not reported or the reader was referred to other organizations' reports. Twenty-one percent of indicators were accompanied by a formal grading of evidence, whereas 41% percent provided no reference to publications.

### Conclusion

1  
2  
3 Although there are many quality indicators related to critical care in the public domain, due to a paucity  
4  
5 of rationale for selection, supporting evidence, and results of implementation, it is not clear which  
6  
7 indicators should be adopted for use.  
8  
9  
10  
11  
12  
13  
14  
15  
16  
17  
18  
19  
20  
21  
22  
23  
24  
25  
26  
27  
28  
29  
30  
31  
32  
33  
34  
35  
36  
37  
38  
39  
40  
41  
42  
43  
44  
45  
46  
47  
48  
49  
50  
51  
52  
53  
54  
55  
56  
57  
58  
59  
60

Confidential

## INTRODUCTION

In the healthcare sector, quality indicators have been developed to compare actual patient care to best practice. They provide a quantitative tool for healthcare providers and decision-makers who aim to improve processes and outcomes of patient care (1). Conceptual frameworks may be used to categorize these indicators (2). Two of the most commonly used frameworks are those of Donabedian (3) and the Institute of Medicine (IOM) (4). In the Donabedian framework, health care quality indicators are categorized as related to structure (conditions under which care is provided), process (methods by which health care is provided), or outcome (changes in health status attributable to health care). From the perspective of patient care, the IOM has identified six dimensions: 1) safety, 2) effectiveness, 3) patient-centeredness, 4) timeliness, 5) efficiency and 6) equity.

As clinicians and ICU decision-makers, we are constantly being asked to produce evidence of performance or improvement in care. However, it is not clear which measures should be used. There is tremendous heterogeneity in their scope, scale, and scientific basis. The scientific literature abounds with a bewildering array of candidate quality indicators (5-7) and intensive care societies, quality improvement organizations, patient advocacy and safety groups have begun to report on quality using some of these indicators. To help inform the rational selection of quality indicators, we undertook a directed environmental scan of quality indicators that are reported by key organizations.

## METHODS

### Search Strategy

We convened a panel of experts to identify organizations that have interests in quality of care or intensive care. The panel consisted of 10 intensivists who have expertise in quality measurement, epidemiology, and systematic reviews from across Canada. Selection of panel members was based on two



1  
2  
3 criteria: 1) scientific productivity in critical care; and 2) clinical and methodological expertise in literature  
4  
5 review. In addition, geographic representativeness of the panel members was sought.  
6  
7

8  
9 We contacted Canadian and provincial organizations (n=15) (i.e. provincial health care quality  
10  
11 councils and critical care societies) that had, at a minimum, published one quality indicator in critical  
12  
13 care. To add to the Canadian data, we also selected a convenience sample of major international  
14  
15 organizations (n=13). We specifically sought information from international intensive care societies and  
16  
17 state-wide integrated health systems that contributed to the science of quality indicator development and  
18  
19 implementation. This international sample was not meant to be comprehensive. It was selected to  
20  
21 benchmark Canadian findings to data from international organizations that operate in similar health care  
22  
23 systems. From August 2012 to January 2013, we reviewed publications and websites from these  
24  
25 organizations to identify quality indicators related to the care of the critically ill. Website content was  
26  
27 searched using the key words “intensive care unit”, “critical care”, and “quality indicator” where  
28  
29 necessary. If no quality indicators relevant to this environmental scan were identified using this search  
30  
31 strategy, the organizations were contacted via electronic mail. We requested information pertaining to  
32  
33 their quality of care initiatives as well as information about how indicators were selected.  
34  
35  
36  
37

38 For the purpose of this environmental scan, we defined a quality indicator as any measurement  
39  
40 proposed by the organization that could be used as a measure for monitoring or improving the quality of  
41  
42 patient care (1). We considered that an indicator had a full operational definition if it included a  
43  
44 description in quantifiable terms of what to measure and the specific steps needed to measure it  
45  
46 consistently (8). Collections of indicators (“bundles”) aimed at improving the care of patients with respect  
47  
48 to a single disease process (e.g. sepsis treatment or ventilator-associated pneumonia prevention bundles),  
49  
50 were counted as single composite measures. They were evaluated as a whole and as individual  
51  
52 components. We included all quality indicators that focused on the care of the critically ill and excluded  
53  
54 indicators used solely in neonatal populations.  
55  
56  
57  
58  
59  
60

1  
2  
3 One reviewer (SV) narratively summarized all identified quality indicators, including their  
4 descriptive definition, measurement criteria, rationale for selection, and evidentiary basis. We also  
5 identified indicators for which information on early implementation results and potential unintended  
6 outcomes was available from targeted organizations.  
7  
8  
9  
10

11  
12 Two of the authors (SV and AG) assessed the redundancy of quality indicators based on reported  
13 operational definitions. We also agreed on the categorization of each quality indicator according to the  
14 Donabedian and the IOM classifications. We extended the latter by adding the “staff work-life” domain,  
15 as used in the Critical Care Vital Signs Monitor project (9).  
16  
17  
18  
19  
20

## 21 22 **RESULTS**

23  
24 Twenty-eight organizations were targeted for inquiry by our expert panel (Table 1). A total of 222  
25 quality indicators were identified from their publications and website content. Out of these 222 indicators,  
26 127 (57% of all indicators) had a full operational definition, 88 (39%) had a partial definition, and 7 (4%)  
27 indicators had no definition at all (i.e. identification by title only). After review of definitions and titles of  
28 the 222 indicators, 127 were considered unique, of which 9 were composite measures (Supplemental file  
29 1).  
30  
31  
32  
33  
34  
35  
36  
37  
38  
39

### 40 **Donabedian Classification**

41  
42 From our review, 11 (8%) of the 127 unique indicators were related to structure, 68 (54%) were  
43 related to processes of care, and 48 (38%) were related to outcome. The most commonly reported  
44 structure indicators were use of private rooms for patients who have antibiotic-resistant infections, nurse  
45 to patient ratios, ICU occupancy, intensivist to patient ratios, and ‘closed’ ICU structure.  
46  
47  
48  
49  
50  
51

52  
53 Process indicators that were endorsed by four or more organizations included compliance with  
54 hand hygiene, formal medication reconciliation process at ICU admission, prescription of venous  
55 thromboembolism prophylaxis, glycemic control protocols, and the implementation of rapid response  
56  
57  
58  
59  
60

1  
2  
3 team. Additionally, nine bundles of indicators were identified as process indicators; these were in the  
4 following categories: 1) Prevention of ventilator-associated pneumonia, 2) Central line insertion and  
5 maintenance, and 3) Sepsis resuscitation and management. These bundles were developed by the Institute  
6 for Health Improvement (IHI), Agency for Healthcare Research and Quality (AHRQ), and the Canadian  
7 Patient Safety Institute (CPSI) through the Safer Healthcare Now! initiative.  
8  
9

10  
11  
12 Similarly, outcomes indicators reported by four or more organizations included catheter related  
13 blood-stream infection rate, ventilator-associated pneumonia rate, ICU-acquired *Clostridium difficile* or  
14 methicillin resistant *Staphylococcus aureus* infections, ICU length of stay, and standardized mortality  
15 ratios.  
16  
17

### 18 19 20 21 22 23 24 25 **IOM Classification**

26  
27  
28 We also categorized the 127 unique quality indicators according to the IOM dimensions of safety,  
29 effectiveness, patient-centeredness, timeliness, efficiency, equity, plus an additional category of staff  
30 work-life. Sixty seven (53%) of the indicators were related to multiple aims. The largest numbers of  
31 quality indicators were in the domains of safety (63 (32%)) and effectiveness (61 (31%)). Twenty-seven  
32 (14%) were related to timeliness, 17 (9%) were related to efficiency, and 16 (9%) were related to staff  
33 work-life. Only ten (5%) indicators were related to patient-centeredness and none were related to equity.  
34  
35  
36  
37  
38  
39  
40  
41

42 The most commonly reported safety indicators were compliance with hand hygiene, formal  
43 medication reconciliation process at ICU admission, prescription of venous thromboembolism  
44 prophylaxis, glycemic control protocols, implementation of a rapid response team, catheter related blood-  
45 stream infection rate, ventilator-associated pneumonia rate, and ICU-acquired *Clostridium difficile* or  
46 methicillin resistant *Staphylococcus aureus* infections. These safety indicators were all endorsed by four  
47 or more organizations. Most often reported effectiveness indicators were: 1) prescription of venous  
48 thromboembolism prophylaxis, 2) glycemic control protocols, 3) catheter related blood-stream infection  
49 rate, 4) ICU length of stay, and 5) standardized mortality ratio.  
50  
51  
52  
53  
54  
55  
56  
57  
58  
59  
60

## IOM-Donabedian Matrix

Table 2 displays the distribution of quality indicators across a two-dimensional matrix that merges the Donabedian classification with the IOM classification. This typology facilitates the evaluation of domains of quality that require further assessment while underscoring the type of information that should be collected. As in other fields of medicine, the greatest number of available indicators are process indicators related to safety and effectiveness. From our review, structure and outcome indicators related to patient-centeredness, efficiency, and equity are lacking among all endorsed indicators in the critically ill.

## Quality Indicator Selection Rationale and Supporting Evidence

Among the 222 identified indicators, organizations' rationale for reporting was a reference to published research (45 indicators, 20%), internal consensus methodology (58 indicators, 26%), or a reference to another organization's established quality indicators (40 indicators, 18%). However, 79 (36%) indicators had no rationale for their selection reported.

Only five of the 28 organizations formally evaluated the level of evidence to support their quality indicators (i.e. GRADE (10), CDC , or AHRQ framework; (11) for 28 (13%) of 222 identified indicators. One organisation assessed 7 quality indicators (3%) through a less rigorous process (i.e. "peer reviewed synthesis of the evidence"). Indicators that were not graded formally or informally were supported by references to literature (77, 35%) or were not supported at all (110, 49%).

Of the 127 unique quality indicators, then, 27 (21%) included a formal evaluation of evidence, 6 (5%) included an informal evaluation, 42 (33%) included a reference to published literature, and 52 (41%) had no reference to evidence provided by the organization. Interestingly, the number of organizations reporting an indicator does not correlate with its evidence grading. Specifically, of the 127 indicators identified, 25 were endorsed by three or more organisations, but only eight of these (32%) were supported by evaluation evidence.

## Early Results of Implementation

Data about the implementation of quality indicators was reported by four of the 28 stakeholder organizations: the Institute for Healthcare Improvement (IHI), the Canadian Patient Safety Institute (CPSI), the Australasian and New Zealand Intensive Care Society (ANZICS), and Health Quality Ontario (HQQ).

## Unintended Outcomes

Three organizations (AHRQ, IHI, and CPSI) reported potential or observed unintended consequences of implementing recommended quality indicators. Each quality indicator endorsed by the AHRQ included an evaluation of its potential for unintended harm, based on a literature review of published evidence. As with the ranking of evidence for the AHRQ quality indicators, the potential for harm was also ranked as low, moderate or high, allowing a direct comparison between the strength of evidence for the use of the quality indicator, and the potential for harm. The IHI and the CPSI reported risks of hypoglycemia associated with use of insulin protocols, pulmonary edema associated with fluid resuscitation, self extubation associated with daily interruptions of sedation, bleeding associated with venous thromboembolism prophylaxis, and *C. difficile* and hospital acquired pneumonia associated with implementation of ventilator-associated pneumonia bundles. Unfortunately, the incidence of unintended consequences was not reported by any of these three organizations.

## DISCUSSION

In this directed environmental scan, we identified a total of 127 unique quality indicators related to critical care. Little agreement exists among the 28 targeted organizations as to which measures should be used to monitor, and will eventually help improve, the quality of care of the critically ill. However, there are common indicators reported in the domains of safety and effectiveness, including measures

1  
2  
3 related to prophylaxis of venous thromboembolism, central line blood stream infection, and glyceimic  
4 control.  
5  
6

7  
8  
9 In order to measure care provided to the critically ill, healthcare providers and managers need  
10 quality indicators that cover structure, process, and outcomes and that address all the dimensions of  
11 quality (12). Although there are a variety of safety and effectiveness measures that address processes of  
12 care, there are very few measures of patient-centeredness, efficiency and equity that address structure and  
13 outcome.  
14  
15  
16  
17  
18

19  
20  
21 Based on available online information, it is clear that targeted stakeholder organizations consider  
22 implementation of quality indicators to be a priority. However, rigorous reporting of the rationale for  
23 selection, evidentiary basis, and evaluation after implementation of these quality indicators was scarce.  
24  
25  
26 Furthermore, authoritative organisations do not report on quality indicators in a systematic manner.  
27  
28

29  
30 We can nonetheless recommend the adoption of quality indicators with the highest grade of  
31 supporting evidence from Table 3. These encompass ventilator-associated pneumonia bundles, measures  
32 to prevent central line associated bloodstream infection, venous thromboembolism prophylaxis, limited  
33 components of sepsis resuscitation and management bundles, glyceimic control policies, the presence of  
34 pharmacist on rounds, and use of simulation exercises for trainees.  
35  
36  
37  
38  
39

40  
41 In this environmental scan, only 127 (57%) of all identified quality indicators had a full  
42 operational definition. While we acknowledge that the development of implementation guidelines for  
43 quality indicators may be beyond the scope of endorsing organizations, a standardized operational  
44 definition may facilitate implementation and evaluation. The CPSI through the Safer Healthcare Now!  
45 initiative, as well as IHI and the AHRQ provide implementation packages. Also, cost estimates (low,  
46 moderate, or high) and resources required for implementation were available in the CPSI and AHRQ  
47 implementation packages. Only four organizations reported early results of implementation and only  
48 AHRQ systematically reported unintended consequences.  
49  
50  
51  
52  
53  
54  
55  
56  
57  
58  
59  
60

1  
2  
3  
4  
5  
6  
7  
8  
9  
10  
11  
12  
13  
14  
15  
16  
17  
18  
19  
20  
21  
22  
23  
24  
25  
26  
27  
28  
29  
30  
31  
32  
33  
34  
35  
36  
37  
38  
39  
40  
41  
42  
43  
44  
45  
46  
47  
48  
49  
50  
51  
52  
53  
54  
55  
56  
57  
58  
59  
60

Increasingly, stakeholder organizations and hospitals are moving toward the use of an amalgamated selection of quality indicators spanning all domains of quality of care to make up a “scorecard” or “dashboard”. The Critical Care Vital Signs Monitor project is one such example of a quality indicator scorecard (9). Critical Care Services Ontario has also developed a scorecard to monitor quality of care (13). Future research will be required to evaluate combinations of indicators and the potential benefits and risks to patient care with their implementation.

This report has several limitations. First, the environmental scan was limited to publications and websites of the targeted organizations. This was primarily a Canadian scan plus a convenience sample of international organizations—it was not a comprehensive search through all pertinent organizations. As a result, it is possible that we have missed important information related to the development of indicators or indicator sets in the biomedical literature. It is also possible that we missed the evidence base, syntheses or evidence assessment methods because such process reports were disseminated through scientific publications. A scoping review of these publications may help discern quality indicators based on their evidence grading. However, as websites and published bulletins are the main public voice of most societies, we believe that this space should include all major important scientific information. An inherent limitation of web searches is also their obsolescence of the reported results.

Secondly, an evaluation of the quality indicators themselves was beyond the scope of the review. We did record whether the quality indicator had an operational definition; however, the definition itself was not evaluated. The key components of a good quality indicator, namely, importance, scientific soundness, useability and feasibility (including cost burden), were also not evaluated in this study.

## CONCLUSION

Many authoritative organizations across the globe have begun to endorse quality indicators, bundles and dashboards with the aim of improving the care of the critically ill. Although the domains of safety and effectiveness are well covered, there is paucity of measures that address patient-centeredness, efficiency, and staff worklife. The notable absence of equity indicators is concerning. The lack of convergence among organisations’ selection of candidate quality indicators, as well as their uneven

1  
2  
3 approaches to report on rationale for selection, evidentiary support, and results of implementation may not  
4  
5 facilitate the adoption of indicators into ICU practice.  
6

#### 7 FOOTNOTES

#### 10 **Authorship contribution**

11  
12  
13  
14 All authors participated in various capacities within the study as well as with this manuscript. SV  
15 was involved with the design, implementation and analysis of all aspects of the study including data  
16 gathering, analysis, and manuscript generation. RR, HTS, JM, CMM, PD, FL, DJC, AJF and PCH were  
17 involved in the study design, data analysis and manuscript edition. AG was involved in the data gathering  
18 and evaluation of quality indicator redundancy across all sources. All were in agreement to the final  
19 version of this manuscript being submitted.  
20  
21  
22  
23  
24  
25  
26

#### 27 **Competing interests**

28  
29  
30 No competing interest to declare.  
31

#### 32 **Ethics approval:**

33  
34  
35 This study only used data already in the public domain and therefore ethical approval was not  
36 required.  
37  
38  
39

#### 40 **Data sharing statement**

41  
42  
43 Data may be obtained by writing to the corresponding author.  
44  
45  
46  
47  
48  
49  
50  
51  
52  
53  
54  
55  
56  
57  
58  
59  
60



## References

1. Mainz J. Defining and classifying clinical indicators for quality improvement. *International journal for quality in health care : journal of the International Society for Quality in Health Care / ISQua*. 2003;15(6):523-30.
2. Stelfox HT, Straus SE. Measuring quality of care: considering measurement frameworks and needs assessment to guide quality indicator development. *Journal of clinical epidemiology*. 2013.
3. Donabedian A. Evaluating the quality of medical care. *Milbank Q*. 2005;83(4):691-729.
4. Institute of Medicine CoQoHCiA. *Crossing the quality chasm : a new health system for the 21st century*. Washington, D.C.: National Academy Press; 2001. xx, 337 p.
5. de Vos M, Graafmans W, Keesman E, Westert G, van der Voort PH. Quality measurement at intensive care units: which indicators should we use? *Journal of critical care*. 2007;22(4):267-74.
6. Berenholtz SM, Dorman T, Ngo K, Pronovost PJ. Qualitative review of intensive care unit quality indicators. *Journal of Critical Care*. 2002;17(1):1-12.
7. Rhodes A, Moreno RP, Azoulay E, Capuzzo M, Chiche JD, Eddleston J, et al. Prospectively defined indicators to improve the safety and quality of care for critically ill patients: a report from the Task Force on Safety and Quality of the European Society of Intensive Care Medicine (ESICM). *Intensive care medicine*. 2012;38(4):598-605.
8. Loyd R. *Quality Health Care: A guide to developing and using indicators*. Barlett Ja, editor2004.
9. Martin C. *Critical Care Vital Signs Monitor: A scorecard for safe and efficient patient care in the ICU* 2009. Available from: <http://www.patientsafetyinstitute.ca/English/research/cpsiResearchCompetitions/2006/Documents/Martin/Report/Martin%20Full%20Report.pdf>.
10. Atkins D, Best D, Briss PA, Eccles M, Falck-Ytter Y, Flottorp S, et al. Grading quality of evidence and strength of recommendations. *BMJ (Clinical research ed)*. 2004;328(7454):1490.
11. Owens DK, Lohr KN, Atkins D, Treadwell JR, Reston JT, Bass EB, et al. AHRQ series paper 5: grading the strength of a body of evidence when comparing medical interventions--agency for healthcare research and quality and the effective health-care program. *Journal of clinical epidemiology*. 2010;63(5):513-23.
12. Quality AfHRA. *Quality Measure Tools and Resource Use Measures. Part IV. Selecting Quality and Resource Use Measures* [May 1 2014]. Available from: <http://www.ahrq.gov/professionals/quality-patient-safety/quality-resources/tools/perfmeasguide/perfmeaspt4.html>.
13. Secretariat CC. *Critical Care Unit, Balanced Scorecard Toolkit*. Ontario: 2012.

|    |                                                                                  |
|----|----------------------------------------------------------------------------------|
| 1  |                                                                                  |
| 2  |                                                                                  |
| 3  | National Critical Care Societies                                                 |
| 4  | Canadian Critical Care Society (CCCS)                                            |
| 5  | American Society of Critical Care Medicine (SCCM)                                |
| 6  | European Society of Intensive Care Medicine (ESICM)                              |
| 7  | Australasian and New Zealand Intensive Care Society (ANZICS)                     |
| 8  | Intensive Care Society (ICS)                                                     |
| 9  | Provincial Critical Care Societies                                               |
| 10 | Alberta Critical Care Clinical Network (ACCCN)                                   |
| 11 | British Columbia Society for Critical Care Medicine (BCSCCM)                     |
| 12 | Ontario Critical Care Secretariat (OCCS)                                         |
| 13 | Provincial Health Quality Councils                                               |
| 14 | British Columbia Patient Safety and Quality Council (BCPSQC)                     |
| 15 | Health Quality Council of Alberta (HQCA)                                         |
| 16 | Saskatchewan Health Quality Council (SHQC)                                       |
| 17 | Manitoba Institute of Patient Safety (MIPS)                                      |
| 18 | Health Quality Ontario (HQO)                                                     |
| 19 | New Brunswick Health Quality Council (NBHQC)                                     |
| 20 | National Health Providers                                                        |
| 21 | Health Canada                                                                    |
| 22 | National Health Service (NHS)                                                    |
| 23 | Quality Improvement & Patient Safety                                             |
| 24 | Canadian Patient Safety Institute (CPSI)                                         |
| 25 | Safer Healthcare Now! Initiative (SHN) Critical Care Vital Signs Monitor Project |
| 26 | (CCVSM)                                                                          |
| 27 | Canadian Healthcare Association (CHA)                                            |
| 28 | National Quality Forum (NQF)                                                     |
| 29 | Institute of Healthcare Improvement (IHI)                                        |
| 30 | Agency for Healthcare and Research Policy (AHRQ)                                 |
| 31 | Health Cost and Utilization Project (HCUP)                                       |
| 32 | National Quality Measures Clearinghouse (NQMC)                                   |
| 33 | Institute of Medicine (IOM)                                                      |
| 34 | Canadian Institute for Health Information (CIHI)                                 |
| 35 | Intensive Care National Audit Research Centre (ICNARC)                           |
| 36 | Accreditation                                                                    |
| 37 | Accreditation Canada                                                             |
| 38 | Other                                                                            |
| 39 | Health Talk Online                                                               |
| 40 | US Department of Veteran Affairs (VA)                                            |
| 41 |                                                                                  |
| 42 |                                                                                  |
| 43 |                                                                                  |
| 44 |                                                                                  |
| 45 |                                                                                  |
| 46 |                                                                                  |
| 47 |                                                                                  |
| 48 |                                                                                  |
| 49 |                                                                                  |
| 50 |                                                                                  |
| 51 |                                                                                  |
| 52 |                                                                                  |
| 53 |                                                                                  |
| 54 |                                                                                  |
| 55 |                                                                                  |
| 56 |                                                                                  |
| 57 |                                                                                  |
| 58 |                                                                                  |
| 59 |                                                                                  |
| 60 |                                                                                  |

|                             | <i>Structure</i> | <i>Process</i>   | <i>Outcome</i>  | <i>Total</i>      |
|-----------------------------|------------------|------------------|-----------------|-------------------|
| <i>Safety</i>               | 1 (1%)           | 33 (17%)         | 29 (15%)        | 63 (32%)          |
| <i>Effectiveness</i>        | 8 (4%)           | 33 (17%)         | 20 (10%)        | 61 (31%)          |
| <i>Patient-centeredness</i> | 0 (0%)           | 8 (4%)           | 2 (1%)          | 10 (5%)           |
| <i>Timeliness</i>           | 3 (2%)           | 19 (10%)         | 5 (3%)          | 27 (14%)          |
| <i>Efficiency</i>           | 2 (1%)           | 13 (7%)          | 2 (1%)          | 17 (9%)           |
| <i>Equity</i>               | 0 (0%)           | 0 (0%)           | 0 (0%)          | 0 (0%)            |
| <i>Staff Worklife</i>       | 8 (4%)           | 4 (2%)           | 4 (2%)          | 16 (9%)           |
| <b>Total</b>                | <b>22 (11%)</b>  | <b>110 (57%)</b> | <b>62 (32%)</b> | <b>194 (100%)</b> |

Note that indicators may overlap multiple domains of quality.

Confidential

| Quality Indicator                                                  | Evidence Grade                      | Implementation results reported |
|--------------------------------------------------------------------|-------------------------------------|---------------------------------|
| <b>Mechanical ventilation</b>                                      |                                     |                                 |
| VAP Bundle                                                         | Moderate to High <sup>(1)</sup>     | Yes <sup>(2)</sup>              |
| • Elevation of the head of the bed                                 | Level 1 <sup>(2)</sup>              | Yes <sup>(2)</sup>              |
| • Daily sedation vacation & assessment of readiness to extubate    | Level 1 <sup>(2)</sup>              | Yes <sup>(2)</sup>              |
| • Prevention of VTE                                                | Level 1 <sup>(2)</sup>              | Yes <sup>(2)</sup>              |
| • PUD prophylaxis                                                  | Level 1 <sup>(2)</sup>              | Yes <sup>(2)</sup>              |
| • Daily oral care with chlorhexidine                               | Level 1 <sup>(2)</sup>              | Yes <sup>(2)</sup>              |
| Pneumonia: blood cultures performed within 24h or prior to arrival | ES <sup>(3)</sup>                   | No                              |
| Pneumonia: antibiotics consistent with guidelines                  | ES <sup>(3)</sup>                   | No                              |
| <b>Invasive procedures</b>                                         |                                     |                                 |
| Ultrasound guidance for CVC insertion                              | High <sup>(1)</sup>                 | No                              |
| Central Line Insertion Bundle                                      | Moderate to High <sup>(1)</sup>     | Yes <sup>(2;5)</sup>            |
| • Maximal barrier precautions                                      | 1B <sup>(5)</sup> ES <sup>(3)</sup> | Yes <sup>(2;5)</sup>            |
| • Chlorhexidine skin antisepsis                                    | 1A <sup>(5)</sup>                   | Yes <sup>(2;5)</sup>            |
| • Hand hygiene                                                     | 1B <sup>(5)</sup>                   | Yes <sup>(2;5)</sup>            |
| • Optimal catheter type and site selection                         | 1A-1B <sup>(5)</sup>                | Yes <sup>(2;5)</sup>            |
| Central Line Care Bundle                                           |                                     | Yes <sup>(2;5)</sup>            |
| • Daily review of line necessity                                   | 1A <sup>(5)</sup>                   | Yes <sup>(2;5)</sup>            |
| • Aseptic lumen access                                             | 1A <sup>(5)</sup>                   | Yes <sup>(2;5)</sup>            |
| • Catheter site and tubing care                                    | 1B <sup>(5)</sup>                   | Yes <sup>(2;5)</sup>            |
| <b>Patient-centered care</b>                                       |                                     |                                 |
| Goals of care documentation                                        | Moderate <sup>(1)</sup>             | No                              |
| <b>Sepsis management</b>                                           |                                     |                                 |
| Sepsis Management Bundle                                           |                                     |                                 |
| • Administer low dose steroids by standard policy                  | 2C <sup>(2;4)</sup>                 | No                              |
| • Maintain adequate glycemic control                               | 1B <sup>(2)</sup>                   | No                              |
| • Prevent excessive inspiratory plateau pressures                  | 1C <sup>(2;4)</sup>                 | Yes <sup>(4)</sup>              |
| Sepsis Resuscitation Bundle                                        |                                     |                                 |
| • Serum lactate measured                                           | 1B <sup>(2)</sup>                   | No                              |
| • Timing of blood cultures                                         | 1C <sup>(2;4)</sup>                 | No                              |

|                                                                     |                                             |                      |
|---------------------------------------------------------------------|---------------------------------------------|----------------------|
| • Treat hypotension and/or elevated lactate with fluids             | 1B <sup>(2)</sup>                           | No                   |
| • Maintain adequate central venous oxygen saturation                | 1C-2C <sup>(2)</sup>                        | No                   |
| • Antibiotics given by time goal                                    | 1B <sup>(2;4)</sup>                         | No                   |
| • Apply vasopressors for ongoing hypotension                        | 1C <sup>(2)</sup>                           | No                   |
| • Maintain adequate CVP                                             | 1C <sup>(2;4)</sup>                         | Yes <sup>(4)</sup>   |
| Sepsis patients with second litre of crystalloid before time goal   | 1C <sup>(4)</sup>                           | No                   |
| Blood cultures drawn before antibiotics                             | 1C <sup>(4)</sup>                           | No                   |
| Glycemic control policies                                           | Moderate to high <sup>(1)</sup>             | No                   |
| • After initial stabilization for patients with severe sepsis       | 1B <sup>(4)</sup>                           | No                   |
| • Validated protocol for insulin dose adjustments                   | 2C <sup>(4)</sup>                           | No                   |
| <b>Prevention of adverse events</b>                                 |                                             |                      |
| Appropriate transfusion practices                                   | Not graded                                  | Yes <sup>(2)</sup>   |
| Pharmacist on rounds                                                | Moderate to high <sup>(1)</sup>             | No                   |
| Medication reconciliation by a pharmacist                           | Moderate <sup>(1)</sup>                     | Yes <sup>(2)</sup>   |
| VTE prophylaxis                                                     | ES <sup>(3)</sup>                           | Yes <sup>(5;7)</sup> |
| Preventing pressure ulcers                                          | Moderate <sup>(1)</sup> ; ES <sup>(3)</sup> | Yes <sup>(2)</sup>   |
| Simulation training                                                 | Moderate to high <sup>(1)</sup>             | No                   |
| Training on infusion pumps                                          | Low <sup>(1)</sup>                          | No                   |
| <b>Infection control</b>                                            |                                             |                      |
| Isolation of patients with resistant infections                     | Moderate <sup>(1)</sup>                     | No                   |
| Hand hygiene improvement                                            | Low <sup>(1)</sup>                          | Yes <sup>(6)</sup>   |
| <b>Staffing</b>                                                     |                                             |                      |
| Rapid response team establishment                                   | Moderate <sup>(1)</sup>                     | Yes <sup>(2,5)</sup> |
| Staffing ratios: increasing nurse to patient ratio to prevent death | Moderate <sup>(1)</sup>                     | No                   |

CDC: center for disease control; CPG: clinical practice guidelines; CVC: central venous catheter; CVP: central venous pressure; DVT: deep vein thrombosis; ES: evidence synthesis; VTE: venous thromboembolism; PUD: pressure ulcer disease.

Reporting organisations (respective evidence grading tool): (1) Agency for Health Research and Quality (AHRQ); (2) Institute for Health Improvement (GRADE); (3) National Quality Measures Clearinghouse (Evidence Synthesis); (4) Society of Critical Care Medicine, European Society of Intensive Care Medicine (GRADE); (5) Canadian Patient Safety Institute (CDC); (6) Health Quality Ontario (Not applicable); (7) Australian and New Zealand Intensive Care Society (Not applicable).

## Supplemental File Content – Listing of all unique quality indicators.

| Unique Quality Indicator                                                                                       | Endorsing organizations                         |
|----------------------------------------------------------------------------------------------------------------|-------------------------------------------------|
| <b>Mechanical Ventilation</b>                                                                                  |                                                 |
| VAP bundle (IHI)                                                                                               | IHI                                             |
| VAP bundle (SHN)                                                                                               | CPSI (SHN)                                      |
| VAP bundle (AHRQ)                                                                                              | AHRQ                                            |
| VAP bundle (Pediatrics)                                                                                        | CPSI (SHN)                                      |
| VAP Rate                                                                                                       | CPSI (SHN), CPSI (CCVSM), OCCS, IHI, ACCCN, HQO |
| Patients ventilated <24 after admission                                                                        | ACCCN                                           |
| Ventilator utilization                                                                                         | ACCCN                                           |
| Invasive ventilator utilization                                                                                | ACCCN, CSPSI (CCVSM), OCCS                      |
| Ventilator volume                                                                                              | ACCCN                                           |
| Inspiratory plateau pressure                                                                                   | SCCM, ESICM                                     |
| Mechanical ventilation with delivery of appropriate tidal volumes                                              | ACCCN                                           |
| Pneumonia: Blood cultures performed within 24h or prior to arrival                                             | NQF, NQMC                                       |
| Pneumonia: antibiotics consistent with guidelines                                                              | NQMC                                            |
| Unplanned extubation rate                                                                                      | ACCCN, CPSI (CCVSM), OCCS                       |
| Ventilated patient flow                                                                                        | CPSI (CCVSM)                                    |
| <b>Invasive Procedures</b>                                                                                     |                                                 |
| Central line insertion bundle (SHN)                                                                            | CPSI (SHN), Accreditation Canada, ACCCN         |
| Central line care bundle (SHN)                                                                                 | CPSI (SHN)                                      |
| Central line bundle (IHI)                                                                                      | IHI                                             |
| Central line insertion protocol with maximal sterile barrier technique                                         | NQMC                                            |
| Measures to prevent central line associated bloodstream infection at time of central venous catheter insertion | NQF                                             |
| Ultrasound guidance for CVC insertion                                                                          | NQF, AHRQ                                       |
| Catheter related blood stream infection rate                                                                   | ACCCN, OCCS, ICH, IHI, ANZCS, HQO, NQF          |
| Occurrence of pneumothorax as a result of CVC placement                                                        | ACCCN                                           |
| Occurrence of inadvertent arterial cannulation as a result of CVC placement                                    | ACCCN                                           |
| Iatrogenic pneumothorax in non neonates                                                                        | NQMC, AHRQ                                      |
| <b>Patient Centered and End of Life Care</b>                                                                   |                                                 |
| Family conference                                                                                              | ACCCN                                           |
| Psychosocial support                                                                                           | ACCCN                                           |
| Spiritual support                                                                                              | ACCCN                                           |
| Bereavement package                                                                                            | ACCCN                                           |
| End of life pathway in place                                                                                   | ICS                                             |
| Comfortable dying                                                                                              | NQF                                             |
| Goals of care documentation                                                                                    | ACCCN, NQF, AHRQ                                |
| Family and patient satisfaction                                                                                | CPSI (CCVSM), OCCS, ACCCN                       |
| Health related quality of life                                                                                 | ACCCN                                           |
| Sedation and restraint                                                                                         | ACCCN, OCCS                                     |
| Deaths in ICU with provision of cardiopulmonary resuscitation                                                  | ACCCN                                           |
| In-hospital deaths occurring in an ICU environment                                                             | ACCCN                                           |
| Code blues                                                                                                     | ACCCN                                           |
| Organ donation                                                                                                 | OCCS                                            |
| Two patient identifiers before service or procedure                                                            | Accreditation Canada                            |
| <b>Sepsis Management</b>                                                                                       |                                                 |
| IHI Sepsis Management bundle                                                                                   | IHI                                             |

|                                                                         |                                                                                |
|-------------------------------------------------------------------------|--------------------------------------------------------------------------------|
| IHI Sepsis Resuscitation bundle                                         | IHI                                                                            |
| Severe sepsis treatment                                                 | NQF, OCCS                                                                      |
| Low dose steroid administration                                         | SCCM, ESICM                                                                    |
| Lactate measure by time goal                                            | BCPSQC                                                                         |
| Antibiotic by time goal                                                 | SCCM, ESICM, BCPSQC                                                            |
| Blood cultures before antibiotics                                       | SCCM, ESICM, BCPSQC                                                            |
| Sepsis patients with second litre crystalloid before time goal          | SCCM, ESICM, BCPSQC                                                            |
| Maintain adequate CVP                                                   | SCCM, ESICM                                                                    |
| Sepsis management bundle reliability                                    | IHI, SCCM, ESICM                                                               |
| Sepsis resuscitation bundle reliability                                 | IHI, SCCM, ESICM                                                               |
| Mortality due to sepsis and septic shock                                | IHI, SCCM, ESICM, BCPSQC                                                       |
| Glucose control or glycemic control policies                            | SCCM, ESICM, BCPSQC, AHRQ, IHI                                                 |
| Evaluation of glycemic control                                          | IHI, BCPSQC                                                                    |
| <b>Prophylaxis and Preventable Adverse Events</b>                       |                                                                                |
| Deep venous thrombosis/venous thromboembolism prophylaxis               | OCCS, ACCCN, CPSI (SHN), ANZICS, BCPSQC, NQF, Accreditation Canada, NQMC, AHRQ |
| Diagnosis of new venous thromboembolism after ICU admission             | ACCCN                                                                          |
| Peptic ulcer disease prophylaxis                                        | AHRQ, ACCCN                                                                    |
| Appropriate transfusion practices                                       | IHI, ACCCN, OCCS                                                               |
| Medication errors                                                       | ACCCN                                                                          |
| Medication reconciliation                                               | ACCCN, Accreditation Canada, CPSI (SHN), IHI                                   |
| Medication reconciliation by pharmacist                                 | AHRQ                                                                           |
| Rate of new GI bleeding                                                 | ACCCN                                                                          |
| Patient falls                                                           | NQF                                                                            |
| Falls with injury                                                       | NQF                                                                            |
| Decubitus ulcer rate                                                    | ACCCN                                                                          |
| Preventing pressure ulcers                                              | IHI, AHRQ                                                                      |
| Pediatric pressure ulcer rate per 1000 admissions                       | NQMC, AHRQ                                                                     |
| Early nutrition                                                         | ICS, OCCS                                                                      |
| <b>Infection Control</b>                                                |                                                                                |
| Isolation of patients with resistant infections                         | ICS, AHRQ                                                                      |
| Hand hygiene                                                            | ICS, HQO, BCPSQC, AHRQ                                                         |
| Reduce antibiotic resistant organisms                                   | CSPI (SHN), CPSI (CCVSM)                                                       |
| Unit acquired bacteremias                                               | ICS                                                                            |
| Methicillin sensitive S. aureus bacteremia                              | NHS                                                                            |
| Unit acquired methicillin resistant S. aureus bacteremia                | ICS, NHQ, HQO                                                                  |
| Vancomycin resistant enterococcus bacteremia                            | HQO                                                                            |
| Unit acquired C. difficile or methicillin resistant S. aureus infection | ICS, HQO, Accreditation Canada, ACCCN                                          |
| Catheter-associated UTI                                                 | NQF                                                                            |
| <b>Staffing</b>                                                         |                                                                                |
| Nurse to patient ratios                                                 | ICS, ACCCN                                                                     |
| Staffing ratios                                                         | AHRQ                                                                           |
| Respiratory therapist to patient ratios                                 | ACCCN                                                                          |
| Intensivist to patient ratios                                           | ACCCN, ICS                                                                     |
| Core staffing by level of acuity                                        | OCCS                                                                           |
| Closed unit (intensivist model)                                         | IHI, OCCS                                                                      |
| Intensivist led management model by level of acuity                     | OCCS                                                                           |
| In-house physician resources                                            | ACCCN                                                                          |
| Workload                                                                | ACCCN                                                                          |

|                                                                                 |                                                      |
|---------------------------------------------------------------------------------|------------------------------------------------------|
| Rapid response team establishment                                               | IHI, CPSI (SHN), ANZICS, AHRQ                        |
| Utilization of rapid response team                                              | IHI                                                  |
| Multidisciplinary rounds take place                                             | ICS, IHI                                             |
| Pharmacist on rounds                                                            | AHRQ                                                 |
| Training on infusion pumps                                                      | Accreditation Canada, AHRQ                           |
| Daily goals                                                                     | ACCCN, ICS, IHI                                      |
| Staff turnover                                                                  | ACCCN                                                |
| Nurse turnover                                                                  | CPSI (CCVSM), OCCS                                   |
| RN absenteeism                                                                  | ACCCN, CPSI (CCVSM), OCCS                            |
| Nurse overtime work hours                                                       | ACCCN, CPSI (CCVSM), OCCS                            |
| CritiCall availability                                                          | OCCS                                                 |
| Critical care networks                                                          | OCCS                                                 |
| <b>Patient Flow and Volume</b>                                                  |                                                      |
| Number of non-clinical transfers                                                | ICS                                                  |
| Repatriation                                                                    | OCCS                                                 |
| Delays in patient admission to the ICU                                          | ACCCN, OCCS                                          |
| Cancelled OR Cases                                                              | ACCCN, OCCS                                          |
| Interfacility ICU transfers                                                     | ACCCN, OCCS, CPSI (CCVSM)                            |
| Access and exit block                                                           | ANZICS                                               |
| Avoidable days                                                                  | ACCCN, CPSI (CCVSM), OCCS                            |
| Case volume                                                                     | ACCCN                                                |
| Occupancy                                                                       | ACCCN, CPSI (CCVSM), OCCS, ICS                       |
| Time from ICU to inpatient bed                                                  | IHI                                                  |
| Number of unplanned transfers                                                   | NHS                                                  |
| Handover (intra and inter ICU)                                                  | ACCCN, Accreditation Canada                          |
| ICU length of stay                                                              | ACCCN, OCCS, IHI, CPSI (CCVSM), NHS, NQF, VA         |
| PICU severity adjusted length of stay                                           | NQF                                                  |
| Deaths within 6 hours of admission                                              | ACCCN                                                |
| <b>ICU Discharges</b>                                                           |                                                      |
| Number of crash calls per 1000 inpatient discharges                             | IHI                                                  |
| Clinical deterioration of ICU discharges within 72 hours                        | ANZICS                                               |
| Night time discharges                                                           | ACCCN, ICS, CPSI (CCVSM), OCCS, VA                   |
| Patient transport out of the ICU using two identifiers                          | ACCCN                                                |
| ICU readmissions within 72 hours                                                | ACCCN, CPSI (CCVSM), OCCS                            |
| ICU readmissions within 48 hours                                                | ICS, VA                                              |
| PICU unplanned readmission rate                                                 | NQF                                                  |
| <b>Quality Improvement</b>                                                      |                                                      |
| Quality improvement program in place                                            | ICS                                                  |
| Utilization of patient assessment systems                                       | ANZICS                                               |
| Regular review of morbidity and mortality                                       | ICS                                                  |
| <b>Mortality and Severity of Illness</b>                                        |                                                      |
| Acuity of illness or burden of disease for patients treated in ICU (SOFA score) | ACCCN                                                |
| Standardized mortality ratio                                                    | ICS, CPSI (CCVSM), NHQ, BCPSQC, ACCCN, OCCS, NQF, VA |
| PICU standardized mortality ratio                                               | NQF                                                  |

ICU: Intensive Care unit; OR: Operating Room; CVP: Central Venous Pressure; CVC: Central Venous Catheter; VAP: Ventilator-Associated Pneumonia; PICU: Pediatric Intensive Care; GI: Gastro-Intestinal; SOFA: Sequential Organ Failure Assessment; RN: Registered Nurse; UTI: Urinary tract Infection.



Meaning of organizations' acronyms can be found in Table 1.

Confidential

1  
2  
3  
4  
5  
6  
7  
8  
9  
10  
11  
12  
13  
14  
15  
16  
17  
18  
19  
20  
21  
22  
23  
24  
25  
26  
27  
28  
29  
30  
31  
32  
33  
34  
35  
36  
37  
38  
39  
40  
41  
42  
43  
44  
45  
46  
47  
48  
49  
50  
51  
52  
53  
54  
55  
56  
57  
58  
59  
60
